# Supplementary material for: Iron–copper bimetallic nanoparticles supported on hollow mesoporous silica spheres: the effect of Fe/Cu ratio on heterogeneous Fenton degradation of a dye
Source: Royal Society of Chemistry journal article supplement (doi:10.1039/c6ra08501f), 2016-01-01
Supplement: c6ra08501f1.pdf [file c6ra08501f1.pdf]

## Electronic Supplementary Information

### **Iron-copper bimetallic nanoparticles supported on hollow mesoporous silica sphere: The effect of Fe/Cu ratio on heterogeneous Fenton degradation of dye**

Jing Wang, Chao Liu, Ijaz Hussain, Cheng Li, Jiansheng Li\*, Xiuyun Sun, Jinyou Shen, Weiqing Han, Lianjun Wang\*

[\*] J. Wang, C. Liu, I. Hussain, C. Li, Prof. J.S. Li, X.Y.Sun, J.Y.Shen, W.Q. Han, L.J. Wang

Jiangsu Key Laboratory of Chemical Pollution Control and Resources Reuse

School of Environmental and Biological Engineering

Nanjing University of Science and Technology

Nanjing 210094, P.R. China

E-mail: lijsh@mail.njust.edu.cn; wanglj@mail.njust.edu.cn

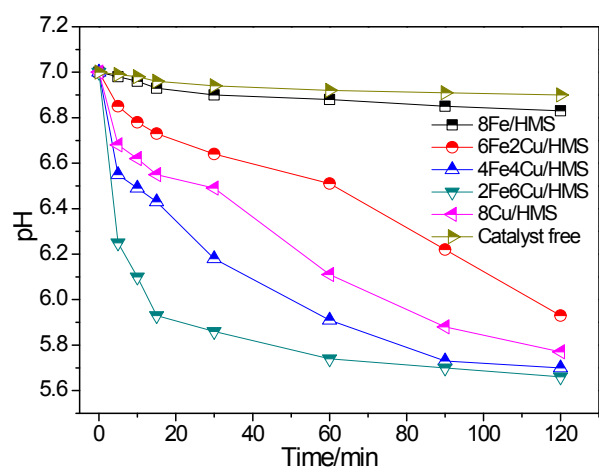

Fig. S1. The evolution of the pH during the degradation of Orange II with different catalysts at pH 7.0 with 27.4 mM H<sub>2</sub>O<sub>2</sub>, 1g/L catalyst dosage, 100 mg/L orange II , 30 °C, in 2 h reaction time.

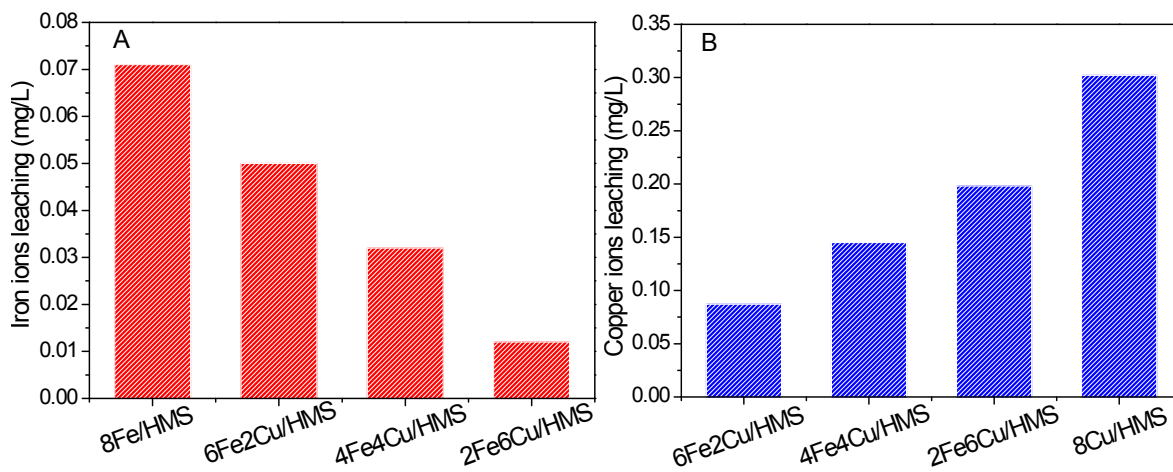

Fig. S2. The concentration of iron ions leaching (A) and copper ions leaching (B) in degradation of Orange II with different catalysts at pH 7.0 with 27.4 mM H<sub>2</sub>O<sub>2</sub>, 1g/L catalyst dosage, 100 mg/L orange II, 30 °C, in 2 h reaction time.

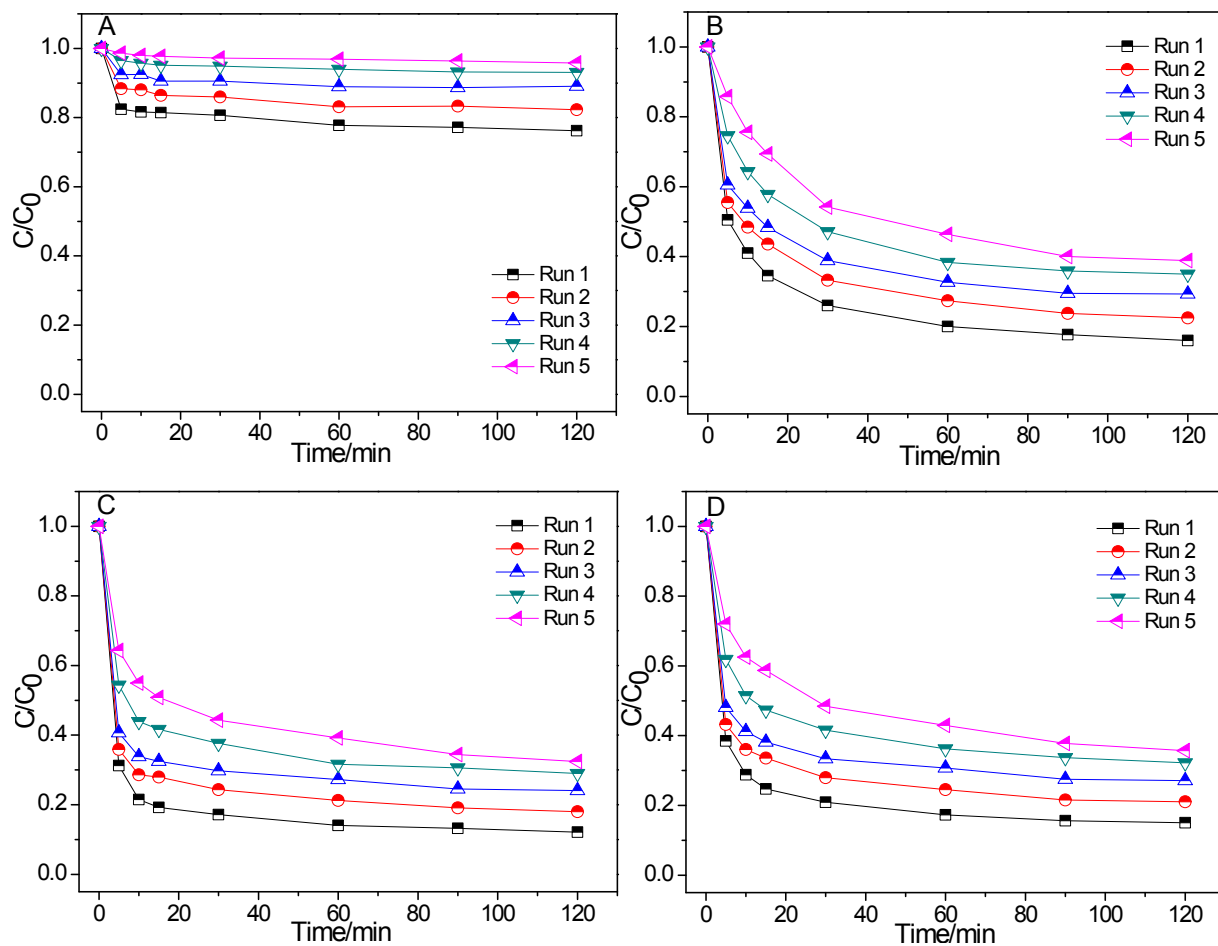

Fig. S3. Degradation of orange II in different batch runs in the (A) 8Fe/HMS, (B) 6Fe2Cu/HMS, (C) 4Fe4Cu/HMS and (D) 8Cu/HMS systems.

Table S1 HPLC-MS identified possible reaction products during orange II degradation

| Compound | Retention time | Chemical name                                                   | Chemical structure                                                                    |
|----------|----------------|-----------------------------------------------------------------|---------------------------------------------------------------------------------------|
| A        | 4.7 min        | 4-[2-(2-hydroxy-1-naphthalenyl)hydrazinyl]-benzenesulfonic acid | 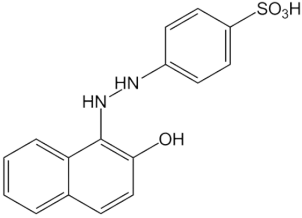   |
| B        | 2.1 min        | 4-amino-benzenesulfonic                                         |   |
| C        | 3.4 min        | 2-hydroxy- 1,4-naphthalenedione                                 |  |
| D        | 2.4 min        | 1,2-naphthalenediol                                             |  |
| E        | 4.1 min        | 1,2-benzenedicarboxylic                                         |  |

Table S2 The capital cost of 2Fe6Cu/HMS to degradation of 1000 mg/L Orange II

| The cost of synthesis catalyst/g                     |             | The cost of degradation of Orange II/L |             |
|------------------------------------------------------|-------------|----------------------------------------|-------------|
|                                                      | Cost (yuan) |                                        | Cost (yuan) |
| NH <sub>3</sub> ·H <sub>2</sub> O                    | 0.08        | Catalyst                               | 8.34        |
| CTAB                                                 | 0.49        |                                        |             |
| TEOS                                                 | 0.47        |                                        |             |
| Ethanol                                              | 3.00        |                                        |             |
| FeSO <sub>4</sub> ·7H <sub>2</sub> O                 | 0.002       | H <sub>2</sub> O <sub>2</sub>          | 0.05        |
| Cu(NO <sub>3</sub> ) <sub>2</sub> ·3H <sub>2</sub> O | 0.028       |                                        |             |
| NaBH <sub>4</sub>                                    | 0.27        |                                        |             |
| Methanol                                             | 3.00        |                                        |             |
| Electric Power                                       | 1.00        | Total                                  | 8.39        |
| Total                                                | 8.34        |                                        |             |

### Cost analysis

The capital cost of 2Fe6Cu/HMS to degradation of 1000 mg/L Orange II was list in Table S2. From the calculation, it can be seen that the synthesis of 1 g 2Fe6Cu/HMS would cost 8.34 yuan. During the degradation of 1 L 1000 mg/L Orange II with the catalyst dosage of 1 g/L and H<sub>2</sub>O<sub>2</sub> dosage of 27.4 mM, the cost of catalyst and H<sub>2</sub>O<sub>2</sub> would be 8.34 and 0.05 yuan, respectively. Totally, it would cost 8.39 yuan. Moreover, it can be observed that the final dye removal rate is 77.7% when conducted at Orange II concentration of 1000 mg/L. Therefore, the cost to degradation of 1 g Orange II is 10.80 yuan.
